# Supplementary material for: Insights into the cotton anther development through association analysis of transcriptomic and small RNA sequencing
Source: PubMed Central journal article supplement (PMC6091077; doi:10.1186/s12870-018-1376-4), 2018-08-03

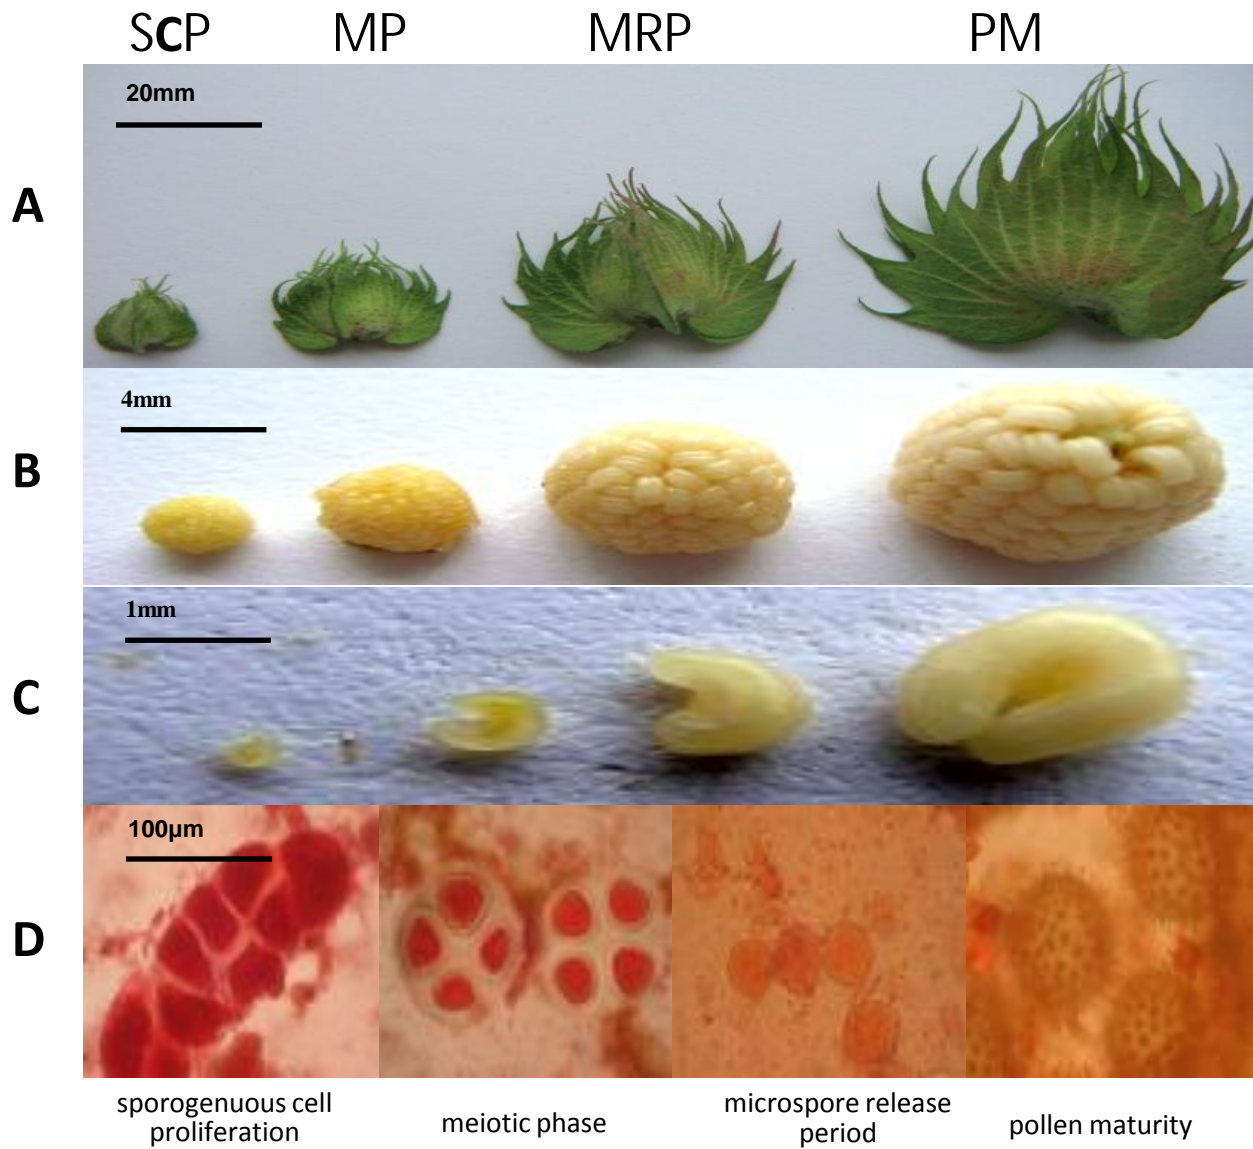

Supplement: 12870_2018_1376_MOESM13_ESM.pdf [file 12870_2018_1376_MOESM13_ESM.pdf]
